# Supplementary material for: A quantitative study of the formation of breath figure templated polymer materials
Source: Royal Society of Chemistry journal article supplement (doi:10.1039/c1sm06158e), 2011-01-01

## Supplementary Information

### A quantitative study of the formation of breath figure templated polymer materials

H. Battenbo, R. J. Cobley and S. P. Wilks

*Multidisciplinary Nanotechnology Centre, College of Engineering, Swansea University, Singleton Park, Swansea, SA2 8PP, UK. E-mail: huwbattenbo@gmail.com; richard.j.cobley@swansea.ac.uk*

1. Diagram showing the thermal distribution of the system at an arbitrary time after deposition. Shows diagrammatically the thermal solver explained in section 2.1 Numerical Model.

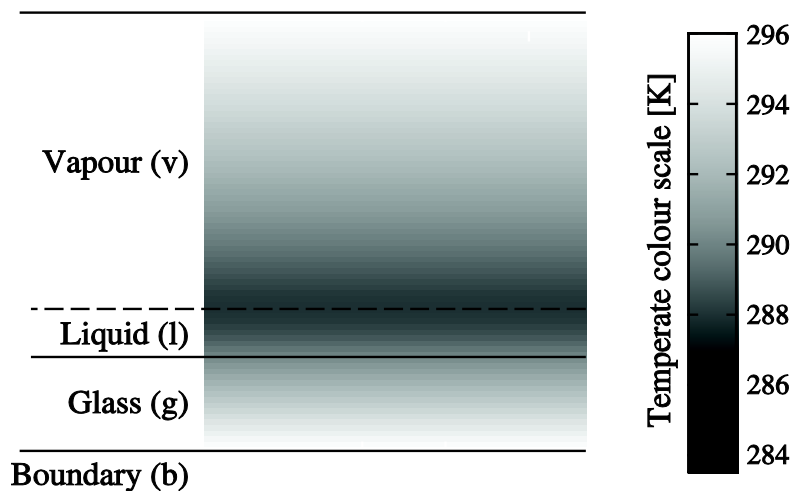

2. Solvent mass profiles over time for different substrate thicknesses, for an ambient temperature of 293K and a flow rate of  $0.2 \text{ ms}^{-1}$ . In support of the statement in section 3.4 “The model shows that as the slide becomes thicker the evaporation rate reduces.”

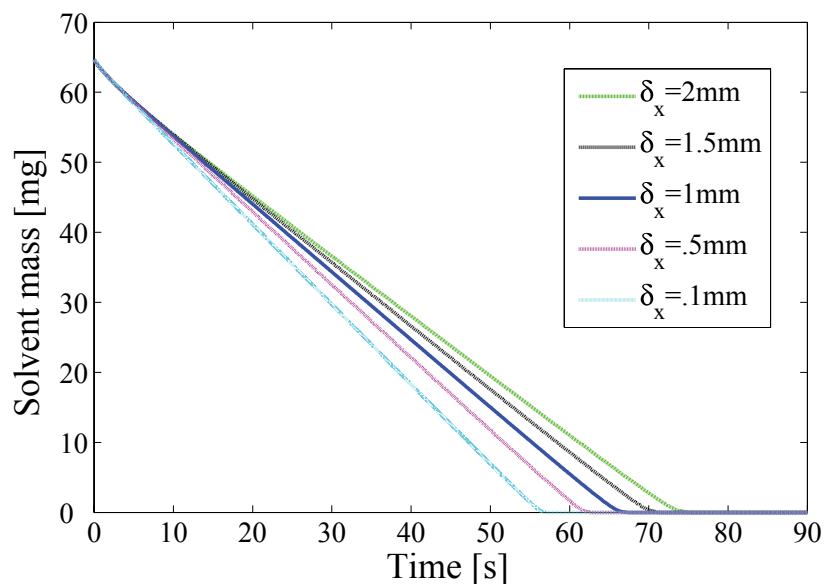

3. Temperature profiles for different substrate thicknesses, for an ambient temperature of 293K and a flow rate of  $0.2\text{ms}^{-1}$ . In support of the statement in section 3.4 “With thicker slides the temperature of the liquid layer falls lower and takes longer to recover.”

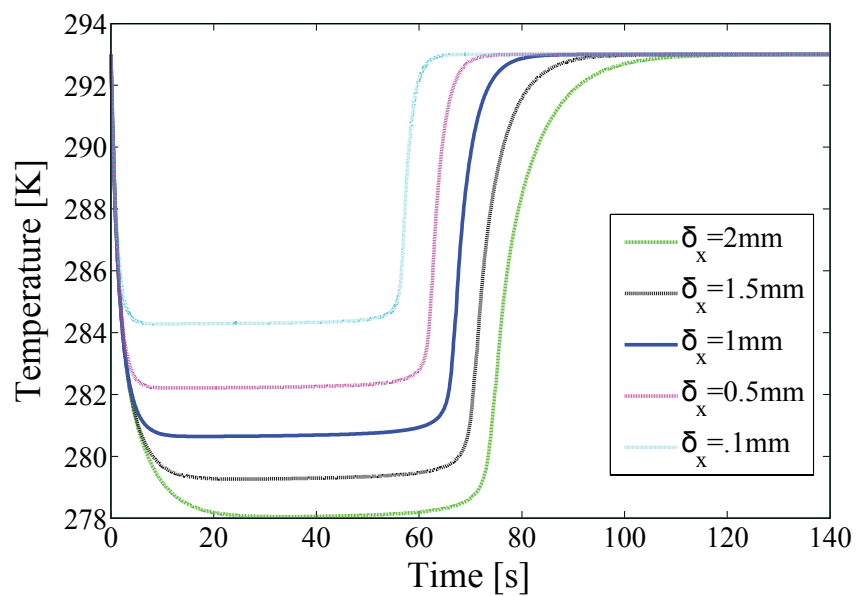

Supplement: c1sm06158e.pdf [file c1sm06158e.pdf]
